# Supplementary material
Source: PubMed Central journal article supplement (PMC4506889)
Supplement: NIHMS697788-supplement-1.pdf [file NIHMS697788-supplement-1.pdf]

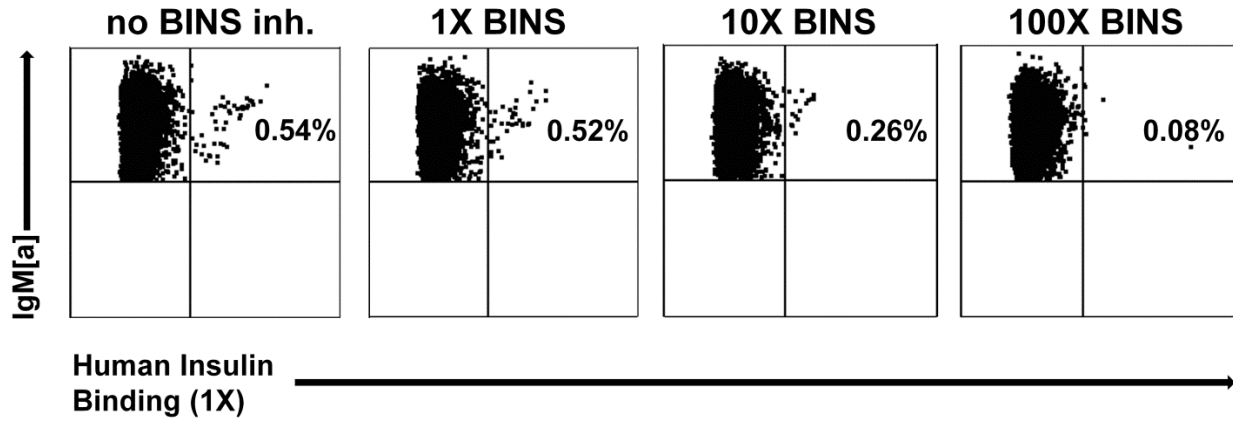

Supplemental Figure: *Bovine insulin successfully competes with human insulin for binding to anti-insulin BCRs.* Using flow cytometry, B cells (B220<sup>+</sup> IgM<sup>a+</sup> live lymphocytes) from V<sub>H</sub>125<sup>SD</sup> B6 mice (n = 6) were incubated with 17 nM (1X) biotinylated human insulin (HINS) in the presence of bovine insulin (BINS) at increasing concentrations in a competitive inhibition assay. 10 µg/mL BINS, or 1.7 µM (100X), completely inhibits HINS binding by anti-insulin BCRs.
